# Supplementary material
Source: Springer Nature journal article supplement (https://www.springermedizin.de/resource/supplementary/12936_2007_468_MOESM2_ESM.pdf/9547516)

Protective Efficacy  
(percent)

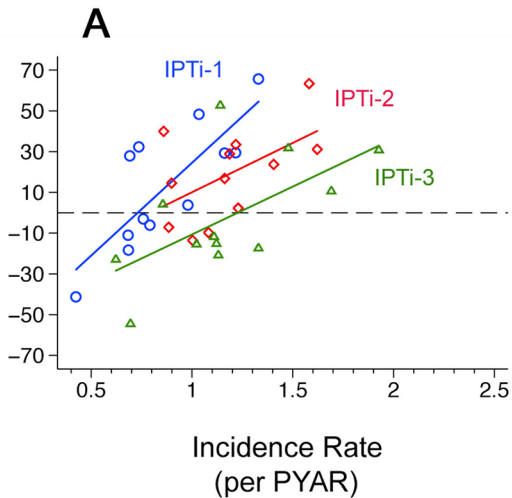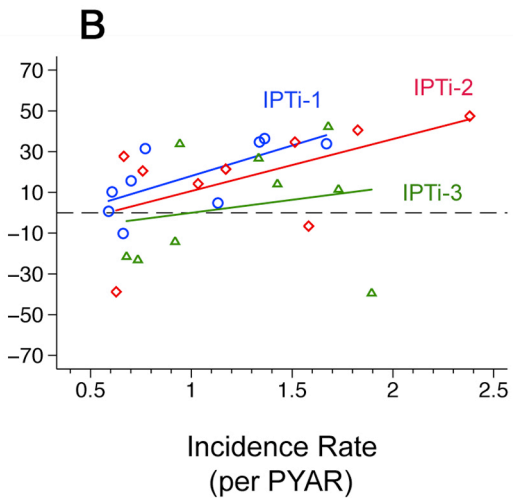

Supplement: MOESM2 [file 9547516]
